# Supplementary material for: Molecular Characterization of Small Ruminant Lentiviruses in Polish Mixed Flocks Supports Evidence of Cross Species Transmission, Dual Infection, a Recombination Event, and Reveals the Existence of New Subtypes within Group A
Source: MDPI journal article supplement (doi:10.3390/v13122529), 2021-12-16
Supplement: s1 [file s1]

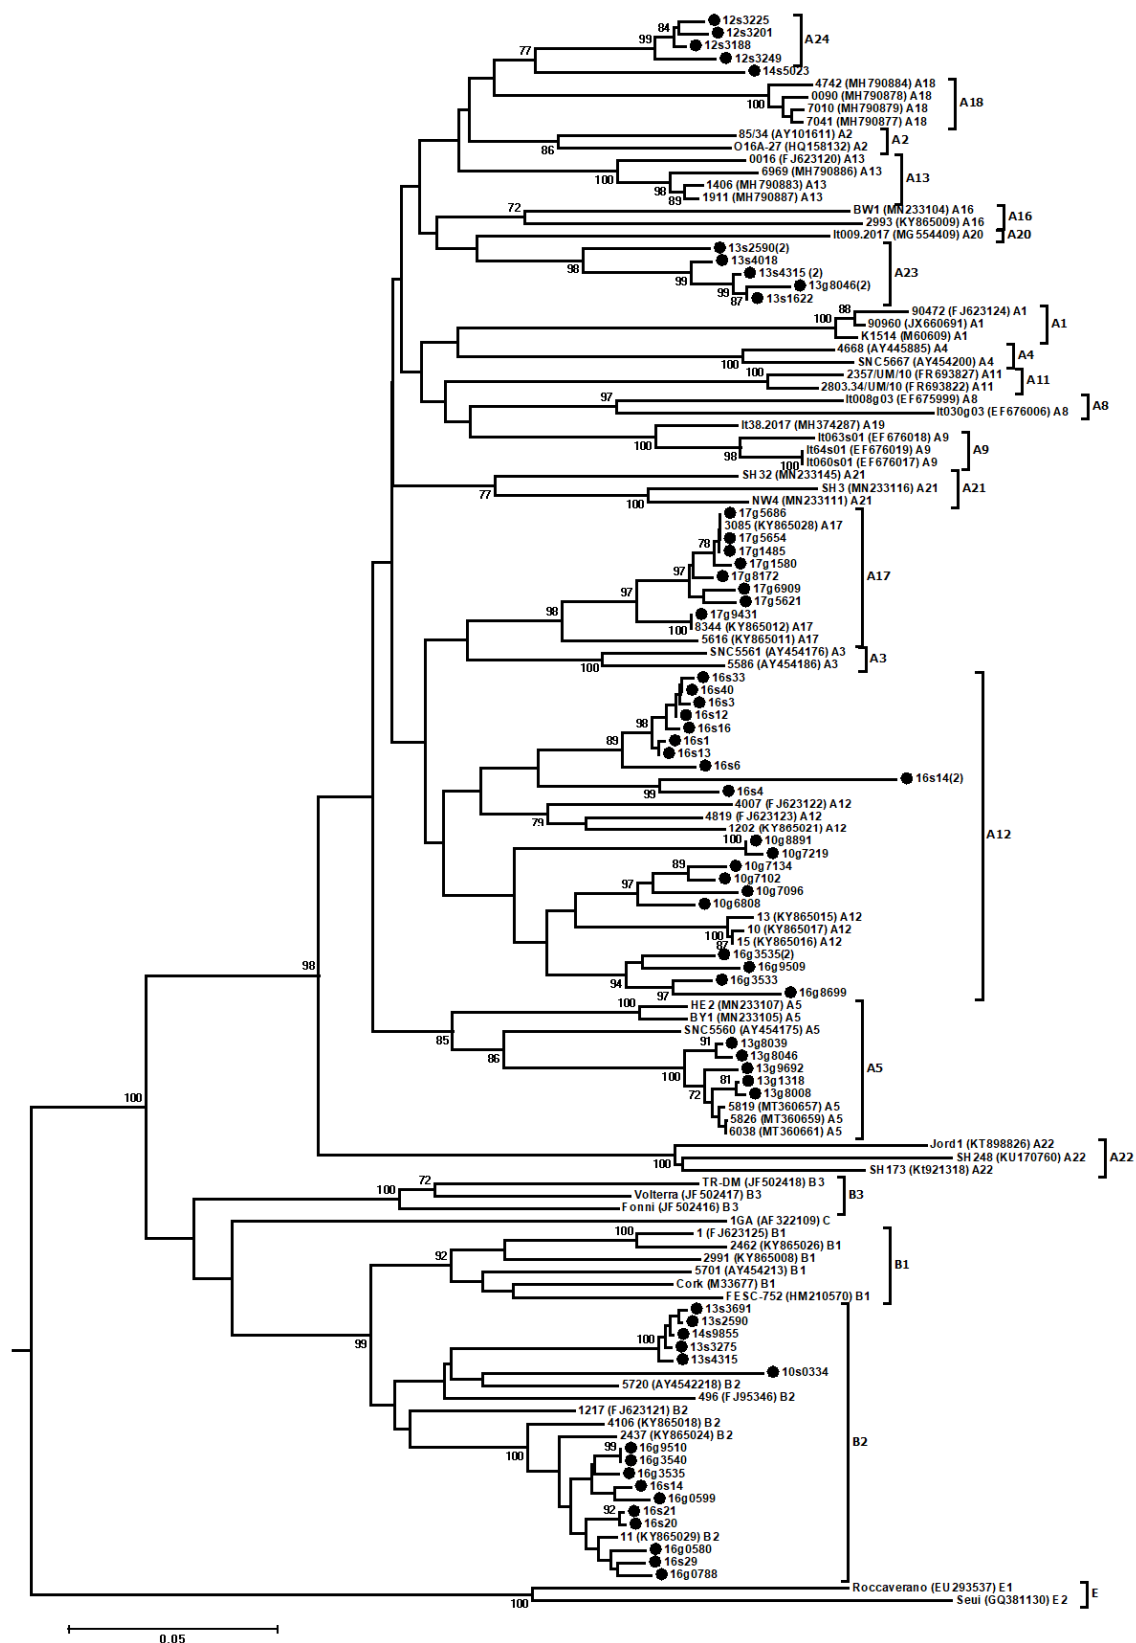

**Figure S1.** Neighbor-joining phylogenetic tree based on alignment of CA fragment of *gag* gene. Sequences from this study are labeled by black circles and their names are preceded by the flock origin and the animal species (s-sheep; g-goat). Numbers at the branches indicate the percentage of bootstrap values obtained from 1000 replicates. Bootstrap values >70% are shown.

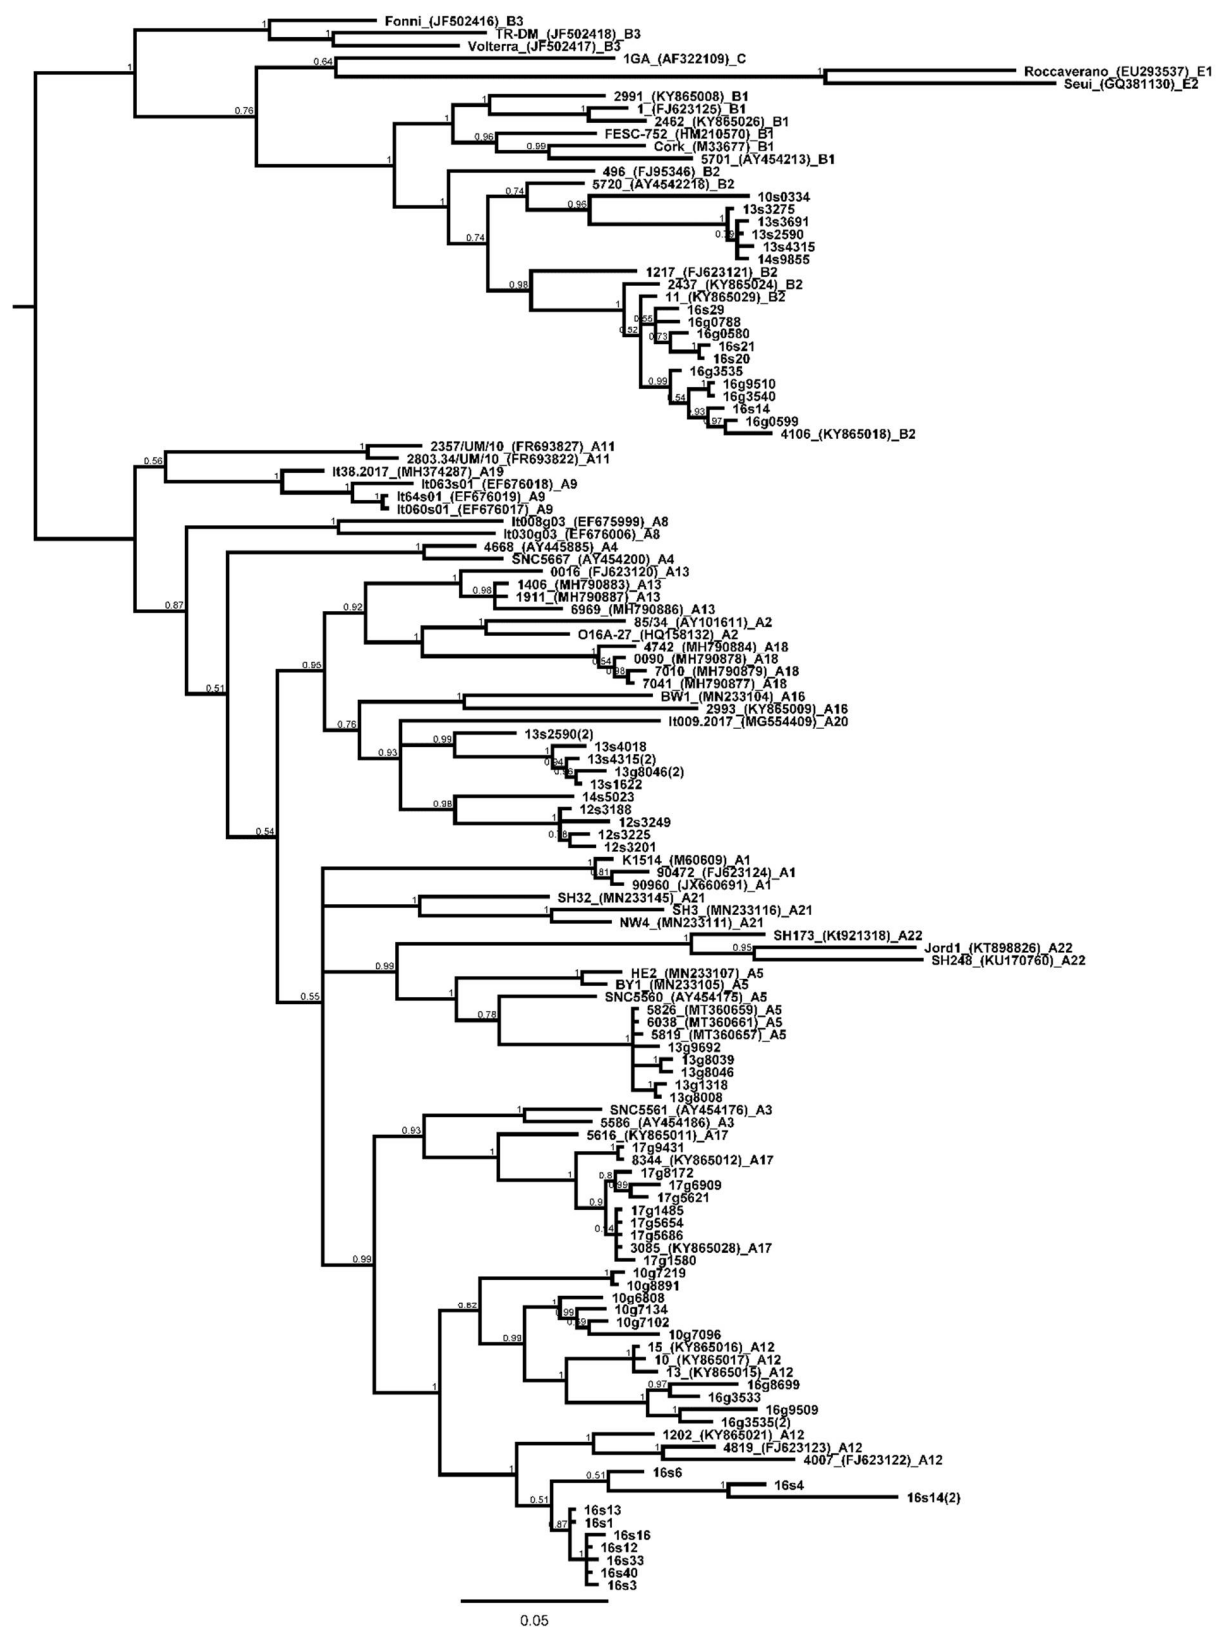

**Figure S2.** Bayesian phylogenetic tree based on alignment of CA fragment of *gag* gene. The name of sequences from this study are preceded by the flock origin and the animal species (s-sheep; g-goat). Posterior probability of each node is showed above branches.

|                |                                                 | Epitope 2         |    |    |    |    |    |    |    |    |    | GG      |
|----------------|-------------------------------------------------|-------------------|----|----|----|----|----|----|----|----|----|---------|
| Cork (B1)      | LQTVMQHGLVSEDFERQLAYATTWTSKDILEVLAMPFGNRAQKELIC | GLNEEAERWRNRNFFPA | GG      |
| K1514 (A1)     |                                                 |                   |    |    |    |    |    |    |    |    |    | Q.S.    |
| 13g9692 (A5)   |                                                 | M                 |    |    |    |    |    |    |    |    |    | HQ.S.A. |
| 13g1318 (A5)   |                                                 |                   |    |    |    |    |    |    |    |    |    | HQ.S.A. |
| 13g8039 (A5)   |                                                 | M                 |    |    |    |    |    |    |    |    |    | HQ.S.A. |
| 13g8008 (A5)   |                                                 | M                 |    |    |    |    |    |    |    |    |    | HQ.S.A. |
| 13g8046 (A5)   |                                                 | M                 |    |    |    |    |    |    |    |    |    | HQ.S.A. |
| 16s6 (A12)     | N                                               | M                 |    |    |    |    |    |    |    |    |    | Q.S.    |
| 16s40 (A12)    | N                                               | M                 |    |    |    |    |    |    |    |    |    | Q.S.    |
| 16s33 (A12)    | N                                               | M                 |    |    |    |    |    |    |    |    |    | Q.S.    |
| 16s16 (A12)    | N                                               | M                 |    |    |    |    |    |    |    |    |    | Q.S.    |
| 16s14' (A12)   | CKN                                             |                   |    |    |    |    |    |    |    |    |    | Q.S.    |
| 16s13 (A12)    | N                                               | M                 |    |    |    |    |    |    |    |    |    | Q.S.    |
| 16s12 (A12)    | N                                               | M                 |    |    |    |    |    |    |    |    |    | Q.S.    |
| 16s1 (A12)     | N                                               | M                 |    |    |    |    |    |    |    |    |    | Q.S.    |
| 16s4 (A12)     | N                                               | M                 |    |    |    |    |    |    |    |    |    | Q.S.    |
| 16s3 (A12)     | N                                               | M                 |    |    |    |    |    |    |    |    |    | Q.S.    |
| 10g7134 (A12)  |                                                 |                   |    |    |    |    |    |    |    |    |    | P.      |
| 10g7102 (A12)  |                                                 |                   |    |    |    |    |    |    |    |    |    | Q.S.    |
| 10g8891 (A12)  |                                                 |                   |    |    |    |    |    |    |    |    |    | Q.S.    |
| 10g7219 (A12)  |                                                 |                   |    |    |    |    |    |    |    |    |    | Q.S.    |
| 10g6808 (A12)  |                                                 | R                 |    |    |    |    |    |    |    |    |    | Q.?     |
| 16g3535 (A12)  | N                                               | V                 |    |    |    |    |    |    |    |    |    | Q.S.    |
| 10g7096 (A12)  |                                                 | I                 |    |    |    |    |    |    |    |    |    | Q.S.    |
| 16g8699 (A12)  |                                                 | I                 |    |    |    |    |    |    |    |    |    | Q.S.    |
| 16g3533 (A12)  | N                                               | V                 |    |    |    |    |    |    |    |    |    | Q.S.    |
| 16g9509 (A12)  | N                                               | I                 | M  |    |    |    |    |    |    |    |    | Q.S.    |
| 17g1580 (A17)  |                                                 | M                 |    |    |    |    |    |    |    |    |    | Q.S.    |
| 17g1485 (A17)  |                                                 | M                 |    |    |    |    |    |    |    |    |    | Q.S.    |
| 17g5686 (A17)  |                                                 | M                 |    |    |    |    |    |    |    |    |    | Q.S.    |
| 17g8172 (A17)  |                                                 |                   |    |    |    |    |    |    |    |    |    | Q.S.    |
| 17g5621 (A17)  |                                                 | R                 |    |    |    |    |    |    |    |    |    | Q.S.    |
| 17g6909 (A17)  |                                                 | R                 |    |    |    |    |    |    |    |    |    | Q.S.    |
| 17g5654 (A17)  |                                                 | M                 |    |    |    |    |    |    |    |    |    | Q.S.    |
| 13s2590' (A23) |                                                 |                   |    |    |    |    |    |    |    |    |    | Q.S.    |
| 13s1622 (A23)  |                                                 |                   |    |    |    |    |    |    |    |    |    | Q.S.    |
| 13s4315' (A23) |                                                 |                   |    |    |    |    |    |    |    |    |    | Q.S.    |
| 13s4018 (A23)  |                                                 |                   |    |    |    |    |    |    |    |    |    | Q.S.    |
| 12s3201 (A24)  |                                                 |                   |    |    |    |    |    |    |    |    |    | Q.S.    |
| 12s3188 (A24)  |                                                 |                   |    |    |    |    |    |    |    |    |    | Q.S.    |
| 12s3225 (A24)  |                                                 |                   |    |    |    |    |    |    |    |    |    | Q.S.    |
| 12s3249 (A24)  |                                                 |                   |    |    |    |    |    |    |    |    |    | Q.S.    |
| 2s5023 (A24)   |                                                 |                   |    |    |    |    |    |    |    |    |    | Q.S.    |
| 10s0334 (B2)   |                                                 |                   |    |    |    |    |    |    |    |    |    | Q.S.    |
| 16g0788 (B2)   |                                                 |                   |    |    |    |    |    |    |    |    |    | Q.S.    |
| 16g0599 (B2)   |                                                 |                   |    |    |    |    |    |    |    |    |    | Q.S.    |
| 16g9510 (B2)   |                                                 |                   |    |    |    |    |    |    |    |    |    | Q.S.    |
| 16g3535' (B2)  |                                                 |                   |    |    |    |    |    |    |    |    |    | Q.S.    |
| 16g3540 (B2)   |                                                 |                   |    |    |    |    |    |    |    |    |    | Q.S.    |
| 16g0580 (B2)   |                                                 |                   |    |    |    |    |    |    |    |    |    | Q.S.    |
| 16s14 (B2)     |                                                 |                   |    |    |    |    |    |    |    |    |    | Q.S.    |
| 16s20 (B2)     |                                                 |                   |    |    |    |    |    |    |    |    |    | Q.S.    |
| 16s21 (B2)     |                                                 |                   |    |    |    |    |    |    |    |    |    | Q.S.    |
| 16s29 (B2)     |                                                 |                   |    |    |    |    |    |    |    |    |    | Q.S.    |
| 13s4315 (B2)   |                                                 |                   |    |    |    |    |    |    |    |    |    | Q.S.    |
| 13s2590 (B2)   |                                                 |                   |    |    |    |    |    |    |    |    |    | Q.S.    |
| 13s3275 (B2)   |                                                 |                   |    |    |    |    |    |    |    |    |    | Q.S.    |
| 13s3691 (B2)   |                                                 |                   |    |    |    |    |    |    |    |    |    | Q.S.    |
| 14s9855 (B2)   |                                                 |                   |    |    |    |    |    |    |    |    |    | Q.S.    |

  

|                |                       | MHR  |       |        |        |      |     |      |      |      |      | Epitope 3 |      |     |    |     |    |    |    |    |   |
|----------------|-----------------------|------|-------|--------|--------|------|-----|------|------|------|------|-----------|------|-----|----|-----|----|----|----|----|---|
| Cork (B1)      | QICLQWINALRAVRHMAHRPG | PMLV | QRTNE | PYEDFA | ARILEA | DAEP | VTQ | PKDY | LKLT | SYTN | ASAD | QQK       | MDRT | LGH | QV | QQA | SV | EE | RM | QA | Q |
| K1514 (A1)     |                       | R    | T     | S      | S      |      |     |      |      |      |      |           |      |     |    |     |    |    |    |    |   |
| 13g9692 (A5)   |                       | T    | S     | S      |        | I    | N   | S    | E    | I    |      |           |      |     |    |     |    |    |    |    |   |
| 13g1318 (A5)   |                       | T    | S     | S      |        | N    | S   | E    | I    |      |      |           |      |     |    |     |    |    |    |    |   |
| 13g8039 (A5)   |                       | T    | S     | S      |        | N    | S   | E    | I    |      |      |           |      |     |    |     |    |    |    |    |   |
| 13g8008 (A5)   |                       | T    | S     | S      |        | N    | S   | E    | I    |      |      |           |      |     |    |     |    |    |    |    |   |
| 10g8046 (A5)   |                       | T    | S     | S      |        | N    | S   | E    | I    |      |      |           |      |     |    |     |    |    |    |    |   |
| 16s6 (A12)     |                       | T    | S     | S      |        | N    | S   | E    | I    |      |      |           |      |     |    |     |    |    |    |    |   |
| 16s40 (A12)    |                       | T    | S     | S      |        | N    | S   | E    | I    |      |      |           |      |     |    |     |    |    |    |    |   |
| 16s33 (A12)    |                       | T    | S     | S      |        | N    | S   | E    | I    |      |      |           |      |     |    |     |    |    |    |    |   |
| 16s16 (A12)    |                       | T    | S     | S      |        | N    | S   | E    | I    |      |      |           |      |     |    |     |    |    |    |    |   |
| 16s14' (A12)   |                       | LT   | S     | S      |        | NS   | S   |      |      |      |      |           |      |     |    |     |    |    |    |    |   |
| 16s13 (A12)    |                       | T    | S     | S      |        | N    | S   | E    | I    |      |      |           |      |     |    |     |    |    |    |    |   |
| 16s12 (A12)    |                       | T    | S     | S      |        | N    | S   | E    | I    |      |      |           |      |     |    |     |    |    |    |    |   |
| 16s1 (A12)     |                       | T    | S     | S      |        | N    | S   | E    | I    |      |      |           |      |     |    |     |    |    |    |    |   |
| 16s4 (A12)     |                       | T    | S     | S      |        | N    | S   | E    | I    |      |      |           |      |     |    |     |    |    |    |    |   |
| 16s3 (A12)     |                       | I    | S     | S      |        | N    | S   | E    | I    |      |      |           |      |     |    |     |    |    |    |    |   |
| 10g7134 (A12)  |                       |      |       |        |        | N    | S   |      |      |      |      |           |      |     |    |     |    |    |    |    |   |
| 10g7102 (A12)  |                       |      |       |        |        | N    | S   |      |      |      |      |           |      |     |    |     |    |    |    |    |   |
| 10g8891 (A12)  |                       | T    | S     | S      |        | NS   | S   |      |      |      |      |           |      |     |    |     |    |    |    |    |   |
| 10g7219 (A12)  |                       | T    | S     | S      |        | NS   | S   |      |      |      |      |           |      |     |    |     |    |    |    |    |   |
| 10g6808 (A12)  |                       |      |       |        |        | R    | S   |      |      |      |      |           |      |     |    |     |    |    |    |    |   |
| 16g3535 (A12)  |                       |      |       |        |        | RNS  | S   | E    | I    |      |      |           |      |     |    |     |    |    |    |    |   |
| 10g7096 (A12)  |                       | M    |       |        |        | N    | S   | E    | I    |      |      |           |      |     |    |     |    |    |    |    |   |
| 16g8699 (A12)  |                       |      |       |        |        | NS   | S   |      |      |      |      |           |      |     |    |     |    |    |    |    |   |
| 16g3533 (A12)  |                       |      |       |        |        | NS   | S   |      |      |      |      |           |      |     |    |     |    |    |    |    |   |
| 16g9509 (A12)  |                       |      |       |        |        | RN   | S   | E    | I    |      |      |           |      |     |    |     |    |    |    |    |   |
| 17g1580 (A17)  |                       | V    | S     |        |        | R    | N   | S    | E    | I    |      |           |      |     |    |     |    |    |    |    |   |
| 17g1485 (A17)  |                       | V    | S     |        |        | R    | N   | S    | E    | I    |      |           |      |     |    |     |    |    |    |    |   |
| 17g5686 (A17)  |                       | V    | S     |        |        | R    | N   | S    | E    | I    |      |           |      |     |    |     |    |    |    |    |   |
| 17g8172 (A17)  |                       |      |       |        |        | R    | N   | S    | E    | I    |      |           |      |     |    |     |    |    |    |    |   |
| 17g5621 (A17)  |                       |      |       |        |        | R    | N   | S    | E    | I    |      |           |      |     |    |     |    |    |    |    |   |
| 17g6909 (A17)  |                       |      |       |        |        | R    | N   | S    | E    | I    |      |           |      |     |    |     |    |    |    |    |   |
| 17g5654 (A17)  |                       | V    | S     |        |        | R    | N   | S    | E    | I    |      |           |      |     |    |     |    |    |    |    |   |
| 13s2590' (A23) |                       | T    | S     | S      |        | N    | S   | E    | I    |      |      |           |      |     |    |     |    |    |    |    |   |
| 13s1622 (A23)  |                       | A    | S     | S      |        | N    | S   | E    | I    |      |      |           |      |     |    |     |    |    |    |    |   |
| 13s4315' (A23) |                       | T    | S     | S      |        | N    | S   | E    | I    |      |      |           |      |     |    |     |    |    |    |    |   |
| 13s4018 (A23)  |                       | T    | S     | S      |        | N    | S   | E    | I    |      |      |           |      |     |    |     |    |    |    |    |   |
| 12s3201 (A24)  |                       | T    | S     | S      |        | N    | S   | E    | I    |      |      |           |      |     |    |     |    |    |    |    |   |
| 12s3188 (A24)  |                       | T    | S     | S      |        | N    | S   | E    | I    |      |      |           |      |     |    |     |    |    |    |    |   |
| 12s3225 (A24)  |                       | T    | S     | S      |        | N    | S   | E    | I    |      |      |           |      |     |    |     |    |    |    |    |   |
| 12s3249 (A24)  |                       | T    | S     | S      |        | N    | S   | E    | I    |      |      |           |      |     |    |     |    |    |    |    |   |
| 2s5023 (A24)   |                       | T    | S     | S      |        | N    | S   | E    | I    |      |      |           |      |     |    |     |    |    |    |    |   |
| 10s0334 (B2)   |                       | L    | S     |        |        | SS   | S   |      |      |      |      |           |      |     |    |     |    |    |    |    |   |
| 16g0788 (B2)   |                       | S    |       |        |        | G    |     |      |      |      |      |           |      |     |    |     |    |    |    |    |   |
| 16g0599 (B2)   |                       | S    |       |        |        | S    |     |      |      |      |      |           |      |     |    |     |    |    |    |    |   |
| 16g9510 (B2)   |                       | S    |       |        |        | S    |     |      |      |      |      |           |      |     |    |     |    |    |    |    |   |
| 16g3535' (B2)  |                       | S    |       |        |        | S    |     |      |      |      |      |           |      |     |    |     |    |    |    |    |   |
| 16g3540 (B2)   |                       | S    |       |        |        | S    |     |      |      |      |      |           |      |     |    |     |    |    |    |    |   |
| 16g0580 (B2)   |                       | S    |       |        |        | S    |     |      |      |      |      |           |      |     |    |     |    |    |    |    |   |
| 16s14 (B2)     |                       | T    | S     |        |        | S    |     |      |      |      |      |           |      |     |    |     |    |    |    |    |   |
| 16s20 (B2)     |                       | S    |       |        |        | S    |     |      |      |      |      |           |      |     |    |     |    |    |    |    |   |
| 16s21 (B2)     |                       | S    |       |        |        | S    |     |      |      |      |      |           |      |     |    |     |    |    |    |    |   |
| 16s29 (B2)     |                       | S    |       |        |        | S    |     |      |      |      |      |           |      |     |    |     |    |    |    |    |   |
| 13s4315 (B2)   |                       | S    |       |        |        | S    |     |      |      |      |      |           |      |     |    |     |    |    |    |    |   |
| 13s2590 (B2)   |                       | S    |       |        |        | S    |     |      |      |      |      |           |      |     |    |     |    |    |    |    |   |
| 13s3275 (B2)   |                       | S    |       |        |        | S    |     |      |      |      |      |           |      |     |    |     |    |    |    |    |   |
| 13s3691 (B2)   |                       | S    |       |        |        | S    |     |      |      |      |      |           |      |     |    |     |    |    |    |    |   |
| 14s9855 (B2)   |                       | S    |       |        |        | S    |     |      |      |      |      |           |      |     |    |     |    |    |    |    |   |

**Figure S3.** Alignment of deduced amino acid sequences of immunodominant epitopes of capsid protein and major homology region (MHR) of the SRLVs obtained in this study and reference strains. Identical residues are indicated by dots (.).
